# Supplementary material for: C-reactive protein to albumin ratio predicts the outcome in renal cell carcinoma: A meta-analysis
Source: PLoS One. 2019 Oct 23;14(10):e0224266. doi: 10.1371/journal.pone.0224266 (PMC6808556; doi:10.1371/journal.pone.0224266)
Supplement: S2 Table — Characteristics of the studies included in the meta-analysis. (XLSX) [file pone.0224266.s002.xlsx]

## Sheet: Sheet1
S2 Table Characteristics of the studies included in the meta-analysis.
Author	Year	Country	Histology	Sample size	Age (years)	Treatment	Stage	Cut-off value	Outcome	HR with its 95% CI	Analysis	NOS	Follow-up (months)
			type									score
Komura	2019	Japan	Mixed	757	62.3 ± 11.7	Surgery	Mixed	1.5	OS	OS:6.04 (4.42-8.27)	UV	7	80
Konishi	2019	Japan	Mixed	176	67 (59-74)	Molecular-	Metastatic	0.05	OS	OS:1.72 (1.26–2.36)	MV	7	NA
						targeted therapy
Guo	2017	China	Mixed	570	51.43 ± 13.52	Surgery	Mixed	0.08	OS/DFS	OS:1.94 (1.12-3.36)	MV	9	65.19
										DFS:2.14 (1.22-3.75)
Tsujino	2019	Japan	Mixed	699	61.9 ± 11.7	Surgery	Mixed	0.073	OS/PFS	OS:2.33 (1.65-3.33)	MV	8	73
										PFS1.51 (1.04−2.19)
Barua	2019	India	Non-clear	31	NA	Surgery	Metastatic	0.11	OS/PFS	OS:1.00 (0.08-1.76)	MV	6	16.5±1.45
										PFS:4.45 (0.56-6.58)
Gao	2019	China	Mixed	108	57 (23-78)	Surgery	Mixed	0.094	OS/DFS	OS:9.64 (2.17-23.78)	MV	9	54.5 (7.3-74.2)
										DFS:4.19 (0.93-18.94)
Agizamhan	2018	China	Mixed	82	NA	Surgery	Mixed	0.083	OS/DFS	OS:6.65 (0.35-127.0)	MV	8	31 (2-108)
										DFS:1.40 (0.43-4.54)
Chen	2015	China	Clear	406	58 (24-80)	Surgery	Mixed	0.06	OS	OS:3.13 (1.07-9.13)	MV	8	63 (1-151)
Abbreviations: OS: overall survival; DFS: disease-free survival; RFS: relapse-free survival; PFS: progression-free survival; UV: univariate MV: multivariate; NA: not available.
